# Supplementary material
Source: Springer Nature journal article supplement (https://www.springermedizin.de/resource/supplementary/12991_2010_1279_MOESM3_ESM.pdf/9615640)

# Meta-analysis random-effects

Study ommited

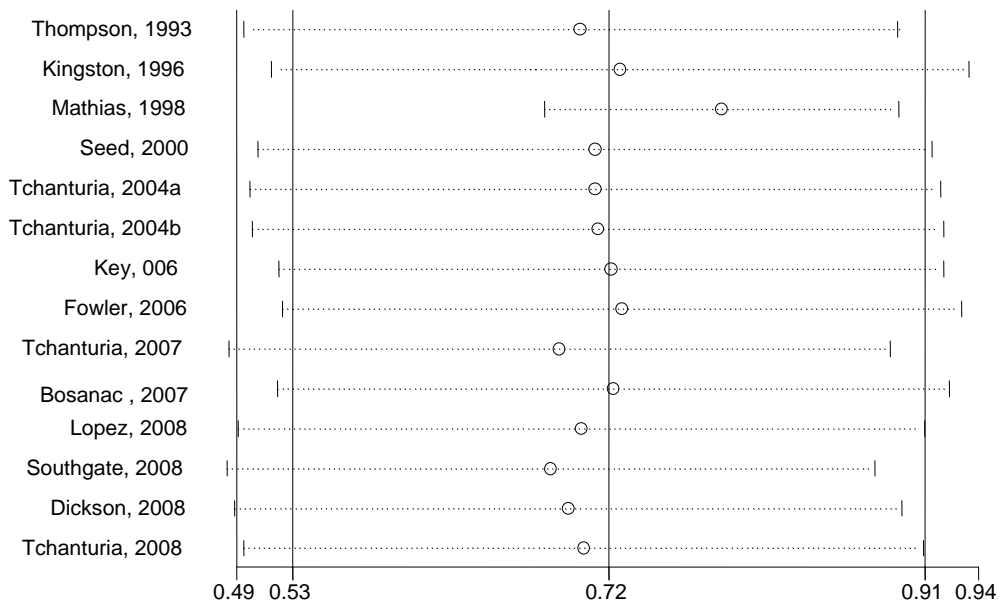

Supplement: MOESM3 [file 9615640]
